# Supplementary material for: Structural deformation upon protein-protein interaction: A structural alphabet approach
Source: PubMed Central journal article supplement (PMC2315654; doi:10.1186/1472-6807-8-12), 2008-02-28
Supplement: 1472-6807-8-12-S1.pdf [file 1472-6807-8-12-S1.pdf]

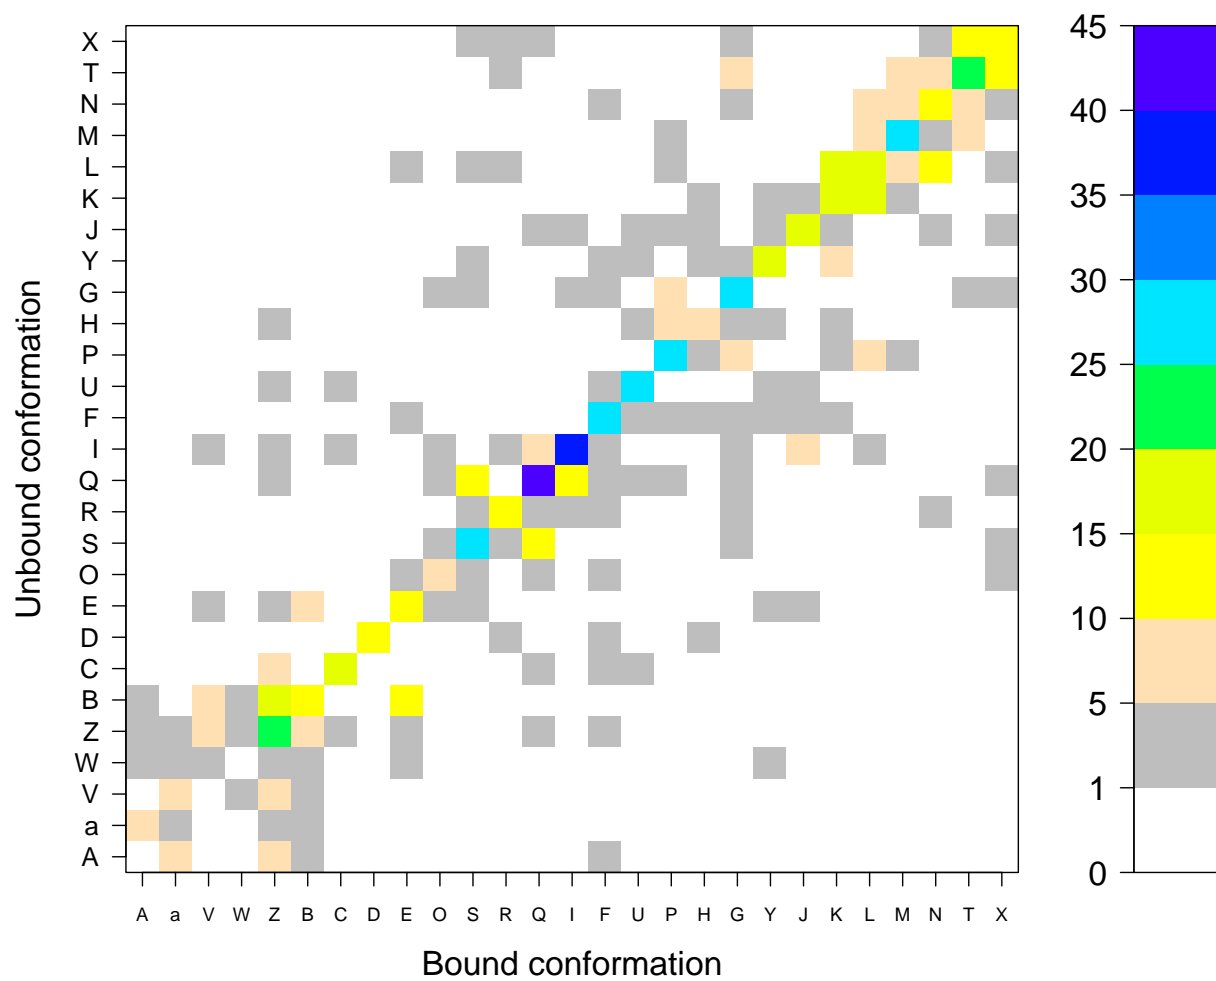

Figure 1: Number of structural letter substitutions corresponding to local rmsd greater than  $0.2\text{\AA}$ , in the interface region of the complex set. The total number of structural letter pairs is 1309.
